# Supplementary material
Source: HighWire-hosted journal article supplement (https://gut.bmj.com/content/66/8/1414)
Supplement: inline-supplementary-material-3 [file inline-supplementary-material-3.pdf]

1 **SUPPLEMENTAL MATERIAL**

2

3 **SUPPLEMENTAL METHODS**

4 **Treatment of ASF mice by emulsifiers**

5 Six weeks old gnotobiotic ASF C57BL/6 mice were exposed to sodium carboxymethylcellulose  
6 (CMC, average  $M_w$  ~250,000) (Sigma-Aldrich, St. Louis, MO, USA) or polysorbate-80 (P80)  
7 (Sigma- Aldrich) diluted in drinking water (1.0% or indicated concentration) (not blinded). The  
8 same water (reverse-osmosis treated Atlanta city water) was used for the water-treated (control)  
9 group. These solutions were autoclaved and changed every week. Fresh feces were collected  
10 every other week for downstream analysis. After 11 weeks of emulsifier treatment, mice were  
11 fasted for 5-h at which time blood was collected by retrobulbar intraorbital capillary plexus.  
12 Hemolysis-free serum was generated by centrifugation of blood using serum separator tubes  
13 (Becton Dickinson, Franklin Lakes, NJ, USA). Mice were then euthanized, and colon length,  
14 colon weight, spleen weight and adipose weight were measured. Organs were collected for  
15 downstream analysis.

16

17 **Quantification of fecal lipocalin-2 (Lcn-2) by ELISA**

18 For quantification of fecal Lcn-2 by ELISA, frozen fecal samples were reconstituted in PBS  
19 containing 0.1% Tween 20 to a final concentration of 100 mg/mL and vortexed for 20 min to get  
20 a homogenous fecal suspension [1]. These samples were then centrifuged for 10 min at 14 000 g  
21 and 4°C. Clear supernatants were collected and stored at -20°C until analysis. Lcn-2 levels were  
22 estimated in the supernatants using DuoSet murine Lcn-2 ELISA kit (R&D Systems,  
23 Minneapolis, MN, USA) using the colorimetric peroxidase substrate tetramethylbenzidine, and

24 optical density (OD) was read at 450 nm (Versamax microplate reader).

25

### 26 **Fecal flagellin and lipopolysaccharide load quantification**

27 Levels of fecal bioactive flagellin and lipopolysaccharide (LPS) were quantified as previously  
28 described [2] using human embryonic kidney (HEK)-Blue-mTLR5 and HEK-Blue-mTLR4 cells,  
29 respectively (Invivogen, San Diego, CA, USA) [2]. Fecal material was resuspended in PBS to a  
30 final concentration of 100 mg/mL and homogenized for 10 s using a Mini-Beadbeater-24 without  
31 the addition of beads to avoid bacteria disruption. Samples were then centrifuged at 8000 g for 2  
32 min and the resulting supernatant was serially diluted and applied on mammalian cells. Purified  
33 *E. coli* flagellin and LPS (Sigma-Aldrich) were used for standard curve determination using  
34 HEK-Blue-mTLR5 and HEK-Blue-mTLR4 cells, respectively. After 24 h of stimulation, the cell  
35 culture supernatant was applied to QUANTI-Blue medium (Invivogen) and the alkaline  
36 phosphatase activity was measured at 620 nm after 30 min.

37

### 38 **Bacterial quantification by q-PCR**

39 For quantification of total fecal bacterial load and ASF composition analysis, total bacterial DNA  
40 was isolated from weighted feces using QIAamp DNA Stool Mini Kit (Qiagen, Hilden,  
41 Germany). DNA was then subjected to quantitative PCR using QuantiFast SYBR Green PCR kit  
42 (Biorad, Hercules, CA, USA) with universal 16S rRNA primers or with primers specific for each  
43 member of the ASF defined microbiota (**Table 1**) [3]. Results are expressed as bacteria number  
44 per mg of stool, using a standard curve, or as relative values. Principal coordinate analysis was  
45 performed using euclidean distance with the 8 ASF members.

46

47 **Short-chain fatty acids (SCFA) quantification**

48 The SCFA in the lumen samples of the M-SHIME were extracted with diethyl ether and  
49 analyzed using a gas chromatograph as previously described [4].

50

51 **Microbiota analysis by 16S rRNA gene sequencing using Illumina technology**

52 16S rRNA gene amplification and sequencing were done using the Illumina MiSeq technology  
53 following the protocol of Earth Microbiome Project with their modifications to the MOBIO  
54 PowerSoil DNA Isolation Kit procedure for extracting DNA ([www.earthmicrobiome.org/emp-](http://www.earthmicrobiome.org/emp-standard-protocols)  
55 [standard-protocols](http://www.earthmicrobiome.org/emp-standard-protocols)) [5, 6]. Bulk DNA was extracted from frozen M-SHIME suspension or feces  
56 using a PowerSoil-htp kit from MoBio Laboratories (Carlsbad, CA, USA) with mechanical  
57 disruption (bead-beating). The 16S rRNA genes, region V4, were PCR amplified from each  
58 sample using a composite forward primer and a reverse primer containing a unique 12-base  
59 barcode, designed using the Golay error-correcting scheme, which was used to tag PCR products  
60 from respective samples [6]. We used the forward primer 515F 5'-

61 *AATGATACGGCGACCACCGAGATCTACACTATGGTAATTGTGTGCCAGCMGCCGCGGT*

62 AA-3': the italicized sequence is the 5' Illumina adapter B, the bold sequence is the primer pad,

63 the italicized and bold sequence is the primer linker and the underlined sequence is the conserved

64 bacterial primer 515F. The reverse primer 806R used was 5'-

65 *CAAGCAGAAGACGGCATAACGAGAT*XXXXXXXXXXXX **AGTCAGTCAG CC**

66 *GGACTACHVGGGTWTCTAAT*-3': the italicized sequence is the 3' reverse complement

67 sequence of Illumina adapter, the 12 X sequence is the golay barcode, the bold sequence is the

68 primer pad, the italicized and bold sequence is the primer linker and the underlined sequence is

69 the conserved bacterial primer 806R. PCR reactions consisted of Hot Master PCR mix

70 (Quantabio, Beverly, MA, USA), 0.2  $\mu$ M of each primer, 10-100 ng template, and reaction  
71 conditions were 3 min at 95°C, followed by 30 cycles of 45 s at 95°C, 60s at 50°C and 90 s at  
72 72°C on a Biorad thermocycler. PCRs products were purified with Ampure magnetic purification  
73 beads (Agencourt, Brea, CA, USA), and visualized by gel electrophoresis. Products were then  
74 quantified (BIOTEK Fluorescence Spectrophotometer) using Quant-iT PicoGreen dsDNA assay.  
75 A master DNA pool was generated from the purified products in equimolar ratios. The pooled  
76 products were quantified using Quant-iT PicoGreen dsDNA assay and then sequenced using an  
77 Illumina MiSeq sequencer (paired-end reads, 2 x 250 bp) at Cornell University, Ithaca.

78

#### 79 **16S rRNA gene sequence analysis**

80 Forward and reverse Illumina reads were joined using the fastq-join method [7, 8], sequences were  
81 demultiplexed, quality filtered using Quantitative Insights Into Microbial Ecology (QIIME,  
82 version 1.8.0) software package [9]. QIIME default parameters were used for quality filtering  
83 (reads truncated at first low-quality base and excluded if: (1) there were more than three  
84 consecutive low quality base calls (2), less than 75% of read length was consecutive high quality  
85 base calls (3), at least one uncalled base was present (4), more than 1.5 errors were present in the  
86 bar code (5), any Phred qualities were below 20, or (6) the length was less than 75 bases).  
87 Sequences were assigned to operational taxonomic units (OTUs) using UCLUST algorithm [10]  
88 with a 97% threshold of pairwise identity (without the creation of new clusters with sequences that  
89 do not match the reference sequences), and classified taxonomically using the Greengenes  
90 reference database 13\_8 [11]. A single representative sequence for each OTU was aligned and a  
91 phylogenetic tree was built using FastTree [12]. The phylogenetic tree was used for computing the  
92 unweighted UniFrac distances between samples [13, 14], rarefaction were performed and used to

93 compare abundances of OTUs across samples. Principal coordinates analysis (PCoA) plots were  
94 used to assess the variation between experimental group (beta diversity). Alpha diversity curves  
95 were determined for all samples using the determination of the number of observed species. LEfSE  
96 (LDA Effect Size) was used to investigate bacterial members that drive differences between groups  
97 [15]. Unprocessed sequencing data are deposited in the European Nucleotide Archive under  
98 accession numbers PRJEB19279 (M-SHIME suspension) and PRJEB19272 (transplant of M-  
99 SHIME suspension to germfree recipient mice).

100

### 101 **16S-based metagenome prediction**

102 PICRUSt (Phylogenetic Investigation of Communities by Reconstruction of Unobserved States)  
103 was used to predict the metagenome based on microbiota composition analysis [16]. A closed-  
104 OTU picking strategy was using against the Greengenes reference database 13\_8 [11], and  
105 metagenomes were predicted. Predicted metagenomes were categorized at level 2 and 3 of the  
106 Kyoto Encyclopedia of genes and genomes (KEGG) pathways. Gene-E was used for heatmap  
107 representation of pathways with an altered abundance following emulsifier consumption compared  
108 with water-treated control group.

109

### 110 **Intraperitoneal injection of M-SHIME suspension to Rag<sup>-/-</sup> mice and quantification of sera** 111 **IL-6 by ELISA**

112 Luminal M-SHIME suspensions were used for intraperitoneal injection to Rag<sup>-/-</sup> mice (100 µL).  
113 Two hours post-injection, mice were bled retro-orbitally, and IL-6 levels were estimated in the  
114 serum using DuoSet murine ELISA kit (R&D Systems, Minneapolis, MN, USA), as previously  
115 reported [2].

## 116 **Immunostaining of mucins and localization of bacteria by FISH**

117 Mucus immunostaining was paired with fluorescent *in situ* hybridization (FISH), as previously  
118 described [17], in order to analyze bacteria localization at the surface of the intestinal mucosa  
119 [18, 19]. Briefly, colonic tissues (proximal colon, 2nd cm from the cecum) containing fecal  
120 material were placed in methanol-Carnoy's fixative solution (60% methanol, 30% chloroform,  
121 10% glacial acetic acid) for a minimum of 3 h at room temperature. Tissues were then washed in  
122 methanol 2 x 30 min, ethanol 2 x 15 min, ethanol/xylene (1:1) 15 min and xylene 2 x 15 min,  
123 followed by embedding in Paraffin with a vertical orientation. Five  $\mu\text{m}$  sections were performed  
124 and dewax by preheating at 60°C for 10 min, followed by xylene 60°C for 10 min, xylene for 10  
125 min and 99.5% ethanol for 10 minutes. Hybridization step was performed at 50°C overnight with  
126 EUB338 probe (5'-GCTGCCTCCCGTAGGAGT-3', with a 5' labeling using Alexa 647) diluted  
127 to a final concentration of 10  $\mu\text{g}/\text{mL}$  in hybridization buffer (20 mM Tris-HCl, pH 7.4, 0.9 M  
128 NaCl, 0.1% SDS, 20% formamide). After washing 10 min in wash buffer (20 mM Tris-HCl, pH  
129 7.4, 0.9 M NaCl) and 3 x 10 min in PBS, PAP pen (Sigma-Aldrich) was used to mark around the  
130 section and block solution (5% fetal bovine serum in PBS) was added for 30 min at 4°C. Mucin-  
131 2 primary antibody (rabbit H-300, Santa Cruz Biotechnology, Dallas, TX, USA) was diluted  
132 1:1500 in block solution and apply overnight at 4°C. After washing 3 x 10 min in PBS, block  
133 solution containing anti-rabbit Alexa 488 secondary antibody diluted 1:1500, Phalloidin-  
134 Tetramethylrhodamine B isothiocyanate (Sigma-Aldrich) at 1  $\mu\text{g}/\text{mL}$  and Hoechst 33258 (Sigma-  
135 Aldrich) at 10  $\mu\text{g}/\text{mL}$  was applied to the section for 2h. After washing 3 x 10 min in PBS slides  
136 were mounted using Prolong anti-fade mounting media (Life Technologies, Carlsbad, CA,  
137 USA). Observations were performed with a Zeiss LSM 700 confocal microscope with software

138 Zen 2011 version 7.1. This software was used to determine the distance between bacteria and  
139 epithelial cell monolayer, as well as the mucus thickness.

140 **SUPPLEMENTAL FIGURE LEGENDS**

141 **Figure S1: Microbiota stabilization in the mucosal-M-SHIME system.** A 8-vessel M-SHIME  
142 system was set up and inoculated with fresh human feces at day -7. Luminal microbiota  
143 composition was analyzed at days -7, -6, -3, -2, 1, 4, 6, 8, 11 and 13 using Illumina sequencing  
144 of the V4 region of 16S rRNA genes. **(A)** Principal coordinates analysis (PCoA) of the weighted  
145 UniFrac distance matrix. **(B)** Microbiota richness (number of OTUs observed) at days -6, 1 and  
146 11. Data are the means +/- S.E.M ( $N=2$ ). Each treatment group was compared with the control  
147 group (day -6) and statistical significance was determined using two-way ANOVA with  
148 Bonferroni's multiple comparisons test.

149

150 **Figure S2: Microbiota stabilization in the mucosal-M-SHIME system.** A 8-vessel M-SHIME  
151 system was set up and inoculated with fresh human feces at day -7. Following a 7-day  
152 stabilization period, vessels were treated with either water ( $N=2$ ), CMC 1% (w/v,  $N=3$ ) or P80  
153 1% (v/v,  $N=3$ ) for 13 days. Luminal microbiota composition was analyzed using Illumina  
154 sequencing of the V4 region of 16S rRNA genes. **(A-C)** Microbiota richness (number of OTUs  
155 observed) at days -6 **(A)**, 1 **(B)** and 11 **(C)**. Data are the means +/- S.E.M ( $N=2-3$ ). Each  
156 treatment group was compared with the control group (water-treated) and statistical significance  
157 was determined using two-way ANOVA with Bonferroni's multiple comparisons test.

158

159 **Figure S3: P80 alters mucus associated mucosal-M-SHIME microbiota composition.** A 8-  
160 vessel M-SHIME system was set up and inoculated with fresh human feces at day -7. Following  
161 a 7-day stabilization period, vessels were treated with either water ( $N=2$ ), CMC 1% (w/v,  $N=3$ )  
162 or P80 1% (v/v,  $N=3$ ) for 13 days. Mucus-associated microbiota composition was analyzed using



163 Illumina sequencing of the V4 region of 16S rRNA genes. Principal coordinates analysis (PCoA)  
164 of the weighted UniFrac distance matrix at days -6 and 11 is represented ( $N=2-3$ ).

165

166 **Figure S4: Figure 5: Both CMC and P80 alter microbial gene expression in the mucosal-M-**

167 **SHIME model.** A 8-vessel M-SHIME system was set up and inoculated with fresh human feces

168 at day -7. Following a 7-day stabilization period, vessels were treated with either water ( $N=2$ ),

169 CMC 1% (w/v,  $N=3$ ) or P80 1% (v/v,  $N=3$ ) for 13 days. M-SHIME-associated luminal

170 metatranscriptome was analyzed by Illumina sequencing. Following functional classification of

171 the reads to the subsystems orthology using MG-RAST, data were plotted as follow: *i*) the

172 difference in abundance between the two compared groups is indicated in log<sub>2</sub> fold change; *ii*) X-

173 axis=relative expression in water-treated samples at day  $x$  versus water-treated samples at day  $y$ ;

174 *iii*) Y-axis=relative expression in emulsifier-treated samples at day  $x$  versus emulsifier-treated

175 samples at day  $y$ . All dot above the diagonal (draw in **A**) represent gene with an increased

176 expression in emulsifier -treated M-SHIME vessels versus water-treated M-SHIME system. All

177 dot below the diagonal (draw in **A**) represent gene with a decreased expression in emulsifier-

178 treated M-SHIME vessels versus water-treated M-SHIME system. Due to the log<sub>2</sub> fold change

179 representation, genes expressed in one condition only are represented as presented in **A** panel. (**B**)

180 Day 1 versus day -6 expression in water and CMC-treated M-SHIME suspensions. (**C**) Day 11

181 versus day -6 expression in water and CMC-treated M-SHIME suspensions. (**D**) Day 11 versus

182 day 1 expression in water and CMC-treated M-SHIME suspensions. (**E**) Day 1 versus day -6

183 expression in water and P80-treated M-SHIME suspensions. (**F**) Day 11 versus day -6 expression

184 in water and P80-treated M-SHIME suspensions. (**G**) Day 11 versus day 1 expression in water and

185 P80-treated M-SHIME suspensions. ( $N=2-3$ ).

186 **Figure S5: Both CMC and P80 alter microbial gene expression in the mucosal-M-SHIME**  
187 **model at various range of functional depths.** A 8-vessel M-SHIME system was set up and  
188 inoculated with fresh human feces at day -7. Following a 7-day stabilization period, vessels were  
189 treated with either water ( $N=2$ ), CMC 1% (w/v,  $N=3$ ) or P80 1% (v/v,  $N=3$ ) for 13 days. M-  
190 SHIME-associated luminal metatranscriptome was analyzed by Illumina sequencing. Following  
191 functional classification of the reads to Kyoto Encyclopedia of genes and genomes (KEGG)  
192 orthology classification at levels 2, 3 and 4 using MG-RAST, days -6, 1 and 11  
193 metatranscriptomes were visualized using area plots ( $N=2-3$ ).

194

195 **Figure S6: CMC and P80 do not alter short-chain fatty acid production in the mucosal-M-**  
196 **SHIME model.** A 8-vessel M-SHIME system was set up and inoculated with fresh human feces  
197 at day -7. Following a 7-day stabilization period, vessels were treated with either water ( $N=2$ ),  
198 CMC 1% (w/v,  $N=3$ ) or P80 1% (v/v,  $N=3$ ) for 13 days. Short-chain fatty acids (acetate, propionate  
199 and butyrate) concentration were determined every day in (A) water-treated, (B) CMC-treated and  
200 (C) P80-treated M-SHIME suspensions. Data are the means  $\pm$  S.E.M ( $N=2-3$ ).

201

202 **Figure S7: CMC and P80 do not alter branched short-chain fatty acid production in the**  
203 **mucosal-M-SHIME model.** A 8-vessel M-SHIME system was set up and inoculated with fresh  
204 human feces at day -7. Following a 7-day stabilization period, vessels were treated with either  
205 water ( $N=2$ ), CMC 1% (w/v,  $N=3$ ) or P80 1% (v/v,  $N=3$ ) for 13 days. Branched-chain fatty acids  
206 concentration was determined every day in water-treated, CMC-treated and P80-treated M-SHIME  
207 suspensions. Data are the means  $\pm$  S.E.M ( $N=2-3$ ).

208

209 **Figure S8: CMC and P80 does not alter LPS levels in the mucosal-M-SHIME model.** A 8-  
210 vessel M-SHIME system was set up and inoculated with fresh human feces at day -7. Following a  
211 7-day stabilization period, vessels were treated with either water ( $N=2$ ), CMC 1% (w/v,  $N=3$ ) or  
212 P80 1% (v/v,  $N=3$ ) for 13 days. **(A)** Luminal M-SHIME suspension LPS levels at days -7, -6, -3,  
213 -2, 1, 4, 6, 8, 11 and 13 days. Data are the means  $\pm$  S.E.M ( $N=2-3$ ).

214

215 **Figure S9: Altered microbiota composition in mice receiving CMC- and P80-treated M-**  
216 **SHIME suspensions.** A 8-vessel M-SHIME system was set up and inoculated with fresh human  
217 feces at day -7. Following a 7-day stabilization period, vessels were treated with either water,  
218 CMC 1% or P80 1% for 13 days. Germfree C57BL/6 mice (3-4 weeks old) were removed from  
219 isolator and were orally administered with 200 $\mu$ L of luminal M-SHIME suspension (day 11  
220 sample). Transplanted mice were then housed in isolated ventilated cages Isocages (Techniplast).  
221 For each condition (water-treated M-SHIME, CMC-treated M-SHIME, P80-treated M-SHIME),  
222 2 cages containing 2-3 animals were used, with each cage receiving suspension from an  
223 independent M-SHIME vessel (for each condition,  $N=2$  vessel,  $N=2$  cages, and  $N=5$  animals).  
224 Fecal microbiota composition was analyzed using Illumina sequencing of the V4 region of 16S  
225 rRNA genes. **(A-B)** Microbiota richness (number of OTUs observed) at days 13 **(A)** and 64 **(B)**.  
226 **(C-F)** LEfSE (LDA Effect Size) was used to investigate bacterial members that drive differences  
227 between groups at days 13 **(C-D)** and 64 **(E-F)**. **(C and E)** LDA scores for the differentially  
228 altered taxa. Blue, water-enriched taxa; red, CMC-enriched taxa; green, P80-enriched taxa. Only  
229 taxa meeting an LDA significant threshold  $>2.0$  are represented. **(D and F)** Taxonomic  
230 cladogram obtained from LEfSe analysis of 16S sequences. Blue, water-enriched taxa; red,  
231 CMC-enriched taxa; green, P80-enriched taxa. The brightness of each dot is proportional to its

232 effect size. Data are the means +/- S.E.M ( $N=5$ ). Each treatment group was compared with the  
233 control group (water-treated) and statistical significance was determined using two-way ANOVA  
234 with Bonferroni's multiple comparisons test.

235

236 **Figure S10: Altered microbiota metatranscriptome in mice receiving CMC- and P80-treated**  
237 **M-SHIME suspensions.** A 8-vessel M-SHIME system was set up and inoculated with fresh  
238 human feces at day -7. Following a 7-day stabilization period, vessels were treated with either  
239 water, CMC 1% or P80 1% for 13 days. Germfree C57BL/6 mice (3-4 weeks old) were removed  
240 from isolator and were orally administered with 200 $\mu$ L of luminal M-SHIME suspension (day 11  
241 sample). Transplanted mice were then housed in isolated ventilated cages Isocages (Techniplast).  
242 For each condition (water-treated M-SHIME, CMC-treated M-SHIME, P80-treated M-SHIME),  
243 2 cages containing 2-3 animals were used, with each cage receiving suspension from an  
244 independent M-SHIME vessel (for each condition,  $N=2$  vessel,  $N=2$  cages, and  $N=5$  animals).  
245 Fecal microbiota composition was analyzed using Illumina sequencing of the V4 region of 16S  
246 rRNA genes, and metagenomes were predicted using PICRUSt (Phylogenetic Investigation of  
247 Communities by Reconstruction of Unobserved States). **(A-B)** Following functional classification  
248 of the reads to Kyoto Encyclopedia of genes and genomes (KEGG) orthology classification at level  
249 4 using PICRUSt, principal coordinates analysis (PCoA) of the euclidean distance matrix were  
250 plotted at days 13 **(A)** and 64 **(B)**. **(C)** Following functional classification of the reads to Kyoto  
251 Encyclopedia of genes and genomes (KEGG) orthology classification at levels 2 and 3 using  
252 PICRUSt, days 13 and 64 metatranscriptomes were visualized using area plots ( $N=2-3$ ). For  
253 clustering analyzing on principal coordinate plots, categories were compared and statistical  
254 significance of clustering were determined using Permanova method

255 **Figure S11: Altered microbiota metatranscriptome in mice receiving CMC- and P80-treated**  
256 **M-SHIME suspensions.** A 8-vessel M-SHIME system was set up and inoculated with fresh  
257 human feces at day -7. Following a 7-day stabilization period, vessels were treated with either  
258 water, CMC 1% or P80 1% for 13 days. Germfree C57BL/6 mice (3-4 weeks old) were removed  
259 from isolator and were orally administered with 200 $\mu$ L of luminal M-SHIME suspension (day 11  
260 sample). Transplanted mice were then housed in isolated ventilated cages Isocages (Techniplast).  
261 For each condition (water-treated M-SHIME, CMC-treated M-SHIME, P80-treated M-SHIME),  
262 2 cages containing 2-3 animals were used, with each cage receiving suspension from an  
263 independent M-SHIME vessel (for each condition,  $N=2$  vessel,  $N=2$  cages, and  $N=5$  animals).  
264 Fecal microbiota composition was analyzed using Illumina sequencing of the V4 region of 16S  
265 rRNA genes, and metagenomes were predicted using PICRUSt (Phylogenetic Investigation of  
266 Communities by Reconstruction of Unobserved States). **(A-H)** Pathways related to flagella  
267 synthesis identified using KEGG orthology (KO). Data are the means  $\pm$  S.E.M ( $N=2-3$ ). Each  
268 treatment group was compared with the control group (water-treated) and statistical significance  
269 was determined using Student's  $t$  tests.

270

271 **Figure S12: Water-treated M-SHIME suspensions does not promote gross change nor**  
272 **metabolic syndrome when transplanted to germfree recipient mice.** A 8-vessels M-SHIME  
273 system was set up and inoculated with fresh human feces at day -7. Germfree C57BL/6 mice (3-  
274 4 weeks old) were removed from isolator and were orally administered with 200 $\mu$ L of luminal  
275 M-SHIME suspension (day 11 sample). Transplanted mice were then housed in isolated  
276 ventilated cages Isocages (Techniplast) and compare to germfree animals. **(A)** 5hr fasting blood  
277 glucose concentration, **(B)** fat pad weight, **(C)** colon weight, **(D)** colon length, **(E)** colon

278 weight/length ratio and (F) spleen weight. Data are the means +/- S.E.M ( $N=3-5$ ). The data for  
279 the water-treated M-SHIME transplanted animals are the same as presented figure 8. Treatment  
280 group was compared with the control group (germfree water-treated) and statistical significance  
281 was determined using Student's *t* tests.

282

283 **Figure S13: CMC- and P80-treated M-SHIME suspensions promote low-grade**  
284 **inflammation when transplanted to germfree recipient mice.** A 8-vessels M-SHIME system  
285 was set up and inoculated with fresh human feces at day -7. Following a 7-day stabilization  
286 period, vessels were treated with either water, CMC 1% or P80 1% for 13 days. Germfree  
287 C57BL/6 mice (5-10 weeks old) were removed from isolator and were orally administered with  
288 200 $\mu$ L of luminal M-SHIME suspension (day 11 sample). Transplanted mice were then housed  
289 in isolated ventilated cages Isocages (Techniplast) and fed irradiated (20-40 kGy) purified high-  
290 fat diet D12492-1.5V from Research Diet company. For each condition (water-, CMC-, and P80-  
291 treated M-SHIMEs), 2 cages containing 1-2 animals were used, with each cage receiving  
292 suspension from an independent M-SHIME vessel (for each condition,  $N=2$  vessel,  $N=2$  cages,  
293 and  $N=3$  animals). (A-B) Absolute (A) and relative (B) body weight over time (due to variability  
294 in initial body weight (day0), day14 was defined as 100%), (C) 5hr fasting blood glucose  
295 concentration, (D) fat pad weight, (E) colon weight, (F) colon length, (G) colon weight/length  
296 ratio and (H) spleen weight. Data are the means +/- S.E.M ( $N=3$ ). Each treatment group was  
297 compared with the control group (water-treated) and statistical significance was determined  
298 using Student's *t* tests or two-way ANOVA with Bonferroni's multiple comparisons test.

299 **SUPPLEMENTAL REFERENCES**

- 300 1 Chassaing B, Srinivasan G, Delgado MA, Young AN, Gewirtz AT, Vijay-Kumar M.  
301 Fecal lipocalin 2, a sensitive and broadly dynamic non-invasive biomarker for intestinal  
302 inflammation. *PLoS One* 2012;**7**:e44328.
- 303 2 Chassaing B, Koren O, Carvalho FA, Ley RE, Gewirtz AT. AIEC pathobiont instigates  
304 chronic colitis in susceptible hosts by altering microbiota composition. *Gut* 2014;**63**:1069-80.
- 305 3 Gomes-Neta JC, Mantz S, Held K, Sinha R, Benson AK, Walter J, *et al.* Evaluation of a  
306 new real-time qPCR assay for quantification of the Altered Schaedler Flora microbiota in  
307 gnotobiotic mice. 2016.
- 308 4 De Weirdt R, Possemiers S, Vermeulen G, Moerdijk-Poortvliet TC, Boschker HT,  
309 Verstraete W, *et al.* Human faecal microbiota display variable patterns of glycerol metabolism.  
310 *FEMS Microbiol Ecol* 2010;**74**:601-11.
- 311 5 Gilbert JA, Meyer F, Jansson J, Gordon J, Pace N, Tiedje J, *et al.* The Earth Microbiome  
312 Project: Meeting report of the "1 EMP meeting on sample selection and acquisition" at Argonne  
313 National Laboratory October 6 2010. *Stand Genomic Sci* 2010;**3**:249-53.
- 314 6 Caporaso JG, Lauber CL, Walters WA, Berg-Lyons D, Huntley J, Fierer N, *et al.* Ultra-  
315 high-throughput microbial community analysis on the Illumina HiSeq and MiSeq platforms. *The*  
316 *ISME journal* 2012;**6**:1621-4.
- 317 7 Aronesty E. Comparison of Sequencing Utility Programs. *The Open Bioinformatics*  
318 *Journal* 2013;**7**:1-8.
- 319 8 Aronesty E. Command-line tools for processing biological sequencing data.  
320 <http://codegooglecom/p/ea-utils> 2011.

321 9 Caporaso JG, Kuczynski J, Stombaugh J, Bittinger K, Bushman FD, Costello EK, *et al.*  
322 QIIME allows analysis of high-throughput community sequencing data. *Nat Med* 2010;**7**:335-6.

323 10 Edgar RC. Search and clustering orders of magnitude faster than BLAST. *Bioinformatics*  
324 2010;**26**:2460-1.

325 11 McDonald D, Price MN, Goodrich J, Nawrocki EP, DeSantis TZ, Probst A, *et al.* An  
326 improved Greengenes taxonomy with explicit ranks for ecological and evolutionary analyses of  
327 bacteria and archaea. *ISME J* 2012;**6**:610-8.

328 12 Price MN, Dehal PS, Arkin AP. FastTree: computing large minimum evolution trees with  
329 profiles instead of a distance matrix. *Mol Biol Evol* 2009;**26**:1641-50.

330 13 Lozupone C, Knight R. UniFrac: a new phylogenetic method for comparing microbial  
331 communities. *Appl Environ Microbiol* 2005;**71**:8228-35.

332 14 Lozupone C, Hamady M, Knight R. UniFrac--an online tool for comparing microbial  
333 community diversity in a phylogenetic context. *BMC Bioinformatics* 2006;**7**:371.

334 15 Segata N, Izard J, Waldron L, Gevers D, Miropolsky L, Garrett WS, *et al.* Metagenomic  
335 biomarker discovery and explanation. *Genome Biol* 2011;**12**:R60.

336 16 Langille MG, Zaneveld J, Caporaso JG, McDonald D, Knights D, Reyes JA, *et al.*  
337 Predictive functional profiling of microbial communities using 16S rRNA marker gene  
338 sequences. *Nat Biotechnol* 2013;**31**:814-21.

339 17 Johansson ME, Hansson GC. Preservation of mucus in histological sections,  
340 immunostaining of mucins in fixed tissue, and localization of bacteria with FISH. *Methods Mol*  
341 *Biol* 2012;**842**:229-35.



342 18 Chassaing B, Koren O, Goodrich JK, Poole AC, Srinivasan S, Ley RE, *et al.* Dietary  
343 emulsifiers impact the mouse gut microbiota promoting colitis and metabolic syndrome. *Nature*  
344 2015;**519**:92-6.

345 19 Chassaing B, Ley RE, Gewirtz AT. Intestinal epithelial cell toll-like receptor 5 regulates  
346 the intestinal microbiota to prevent low-grade inflammation and metabolic syndrome in mice.  
347 *Gastroenterology* 2014;**147**:1363-77 e17.

348
